# Supplementary material
Source: MDPI journal article supplement (https://www.mdpi.com/2304-6740/6/3/68)

# checkCIF/PLATON report

Structure factors have been supplied for datablock(s) compound2a, compound2b, compound5a, compound5b

THIS REPORT IS FOR GUIDANCE ONLY. IF USED AS PART OF A REVIEW PROCEDURE FOR PUBLICATION, IT SHOULD NOT REPLACE THE EXPERTISE OF AN EXPERIENCED CRYSTALLOGRAPHIC REFEREE.

No syntax errors found.      CIF dictionary      Interpreting this report

## Datablock: compound2a

---

Bond precision:    C-C = 0.0030 Å                      Wavelength=0.71073

Cell:                      a=10.3039(3)              b=18.5923(5)              c=21.1023(6)  
                            alpha=90                      beta=90                      gamma=90  
Temperature:              103 K

|                        | Calculated           | Reported      |
|------------------------|----------------------|---------------|
| Volume                 | 4042.6(2)            | 4042.6(2)     |
| Space group            | P b c a              | P b c a       |
| Hall group             | -P 2ac 2ab           | -P 2ac 2ab    |
| Moiety formula         | C20 H13 Cl Se, C6 H6 | C26 H19 Cl Se |
| Sum formula            | C26 H19 Cl Se        | C26 H19 Cl Se |
| Mr                     | 445.82               | 445.82        |
| Dx, g cm <sup>-3</sup> | 1.465                | 1.465         |
| Z                      | 8                    | 8             |
| Mu (mm <sup>-1</sup> ) | 1.998                | 1.998         |
| F000                   | 1808.0               | 1808.0        |
| F000'                  | 1808.97              |               |
| h,k,lmax               | 12,22,26             | 12,22,26      |
| Nref                   | 3976                 | 3943          |
| Tmin,Tmax              | 0.825,0.905          | 0.754,0.907   |
| Tmin'                  | 0.741                |               |

Correction method= # Reported T Limits: Tmin=0.754 Tmax=0.907  
AbsCorr = MULTI-SCAN

Data completeness= 0.992                      Theta(max)= 26.000

R(reflections)= 0.0279( 3245)              wR2(reflections)= 0.0615( 3943)

S = 1.035                      Npar= 253

---

The following ALERTS were generated. Each ALERT has the format

**test-name\_ALERT\_alert-type\_alert-level.**

Click on the hyperlinks for more details of the test.

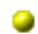

#### Alert level C

|                   |                                                  |       |        |
|-------------------|--------------------------------------------------|-------|--------|
| PLAT906_ALERT_3_C | Large K Value in the Analysis of Variance .....  | 3.424 | Check  |
| PLAT911_ALERT_3_C | Missing FCF Refl Between Thmin & STh/L= 0.600    | 32    | Report |
| PLAT913_ALERT_3_C | Missing # of Very Strong Reflections in FCF .... | 12    | Note   |

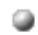

#### Alert level G

|                   |                                                  |        |       |
|-------------------|--------------------------------------------------|--------|-------|
| PLAT042_ALERT_1_G | Calc. and Reported MoietyFormula Strings Differ  | Please | Check |
| PLAT910_ALERT_3_G | Missing # of FCF Reflection(s) Below Theta(Min). | 1      | Note  |
| PLAT960_ALERT_3_G | Number of Intensities with I < - 2*sig(I) ...    | 2      | Check |
| PLAT978_ALERT_2_G | Number C-C Bonds with Positive Residual Density. | 18     | Info  |

---

0 **ALERT level A** = Most likely a serious problem - resolve or explain  
0 **ALERT level B** = A potentially serious problem, consider carefully  
3 **ALERT level C** = Check. Ensure it is not caused by an omission or oversight  
4 **ALERT level G** = General information/check it is not something unexpected

1 ALERT type 1 CIF construction/syntax error, inconsistent or missing data  
1 ALERT type 2 Indicator that the structure model may be wrong or deficient  
5 ALERT type 3 Indicator that the structure quality may be low  
0 ALERT type 4 Improvement, methodology, query or suggestion  
0 ALERT type 5 Informative message, check

---

## Datablock: compound2b

---

Bond precision: C-C = 0.0050 A

Wavelength=0.78230

|       |              |                 |              |
|-------|--------------|-----------------|--------------|
| Cell: | a=15.3100(3) | b=8.0496(1)     | c=13.8261(3) |
|       | alpha=90     | beta=115.690(3) | gamma=90     |

Temperature: 93 K

|                | Calculated    | Reported      |
|----------------|---------------|---------------|
| Volume         | 1535.49(6)    | 1535.49(6)    |
| Space group    | P 21/c        | P 21/c        |
| Hall group     | -P 2ybc       | -P 2ybc       |
| Moiety formula | C20 H13 Cl Te | C20 H13 Cl Te |
| Sum formula    | C20 H13 Cl Te | C20 H13 Cl Te |
| Mr             | 416.35        | 416.35        |
| Dx,g cm-3      | 1.801         | 1.801         |
| Z              | 4             | 4             |
| Mu (mm-1)      | 2.690         | 2.690         |
| F000           | 808.0         | 808.0         |
| F000'          | 807.60        |               |
| h,k,lmax       | 21,11,19      | 21,11,19      |
| Nref           | 4469          | 4065          |
| Tmin,Tmax      | 0.973,0.973   | 0.974,0.974   |
| Tmin'          | 0.973         |               |

Correction method= # Reported T Limits: Tmin=0.974 Tmax=0.974  
AbsCorr = MULTI-SCAN

Data completeness= 0.910                      Theta(max)= 33.333

R(reflections)= 0.0483( 3521)              wR2(reflections)= 0.1284( 4065)

S = 1.084                                      Npar= 218

The following ALERTS were generated. Each ALERT has the format

**test-name\_ALERT\_alert-type\_alert-level.**

Click on the hyperlinks for more details of the test.

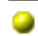

#### Alert level C

|                   |                                                  |         |        |
|-------------------|--------------------------------------------------|---------|--------|
| PLAT094_ALERT_2_C | Ratio of Maximum / Minimum Residual Density .... | 2.36    | Report |
| PLAT220_ALERT_2_C | Non-Solvent Resd 1 Cl    Ueq(max)/Ueq(min) Range | 5.2     | Ratio  |
| PLAT220_ALERT_2_C | Non-Solvent Resd 1 Te    Ueq(max)/Ueq(min) Range | 3.7     | Ratio  |
| PLAT911_ALERT_3_C | Missing FCF Refl Between Thmin & STh/L=    0.600 | 6       | Report |
| PLAT926_ALERT_1_C | Reported and Calculated    R1 Differ by .....    | -0.0017 | Check  |
| PLAT927_ALERT_1_C | Reported and Calculated    wR2 Differ by .....   | -0.0036 | Check  |
| PLAT971_ALERT_2_C | Check Calcd Resid. Dens.    0.75A    From Te1    | 2.21    | eA-3   |
| PLAT971_ALERT_2_C | Check Calcd Resid. Dens.    0.71A    From Te2    | 2.05    | eA-3   |
| PLAT971_ALERT_2_C | Check Calcd Resid. Dens.    0.68A    From Te2    | 2.04    | eA-3   |
| PLAT971_ALERT_2_C | Check Calcd Resid. Dens.    0.76A    From Te1    | 1.89    | eA-3   |
| PLAT971_ALERT_2_C | Check Calcd Resid. Dens.    0.82A    From Te1    | 1.67    | eA-3   |
| PLAT971_ALERT_2_C | Check Calcd Resid. Dens.    0.84A    From Te1    | 1.56    | eA-3   |

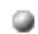

#### Alert level G

|                   |                                                                                       |      |       |
|-------------------|---------------------------------------------------------------------------------------|------|-------|
| ABSMU01_ALERT_1_G | Calculation of _exptl_absorpt_correction_mu<br>not performed for this radiation type. |      |       |
| PLAT066_ALERT_1_G | Predicted and Reported Tmin&Tmax Range Identical                                      | ?    | Check |
| PLAT301_ALERT_3_G | Main Residue Disorder .....(Resd 1 )                                                  | 9%   | Note  |
| PLAT367_ALERT_2_G | Long? C(sp?)-C(sp?) Bond    Cl            - C2            .                           | 1.54 | Ang.  |
| PLAT367_ALERT_2_G | Long? C(sp?)-C(sp?) Bond    Cl            - C8            .                           | 1.54 | Ang.  |

PLAT367\_ALERT\_2\_G Long? C(sp?)-C(sp?) Bond C1 - C14 . 1.54 Ang.  
 PLAT912\_ALERT\_4\_G Missing # of FCF Reflections Above STh/L= 0.600 398 Note  
 PLAT933\_ALERT\_2\_G Number of OMIT Records in Embedded .res File ... 5 Note  
 PLAT978\_ALERT\_2\_G Number C-C Bonds with Positive Residual Density. 4 Info  
 PLAT984\_ALERT\_1\_G The C-f' = -0.002 Deviates from the B&C-Value 0.004 Ch  
 PLAT984\_ALERT\_1\_G The Cl-f' = 0.143 Deviates from the B&C-Value 0.172 Ch  
 PLAT984\_ALERT\_1\_G The Te-f' = -0.734 Deviates from the B&C-Value -0.348 Ch

---

0 **ALERT level A** = Most likely a serious problem - resolve or explain  
 0 **ALERT level B** = A potentially serious problem, consider carefully  
 12 **ALERT level C** = Check. Ensure it is not caused by an omission or oversight  
 12 **ALERT level G** = General information/check it is not something unexpected

7 ALERT type 1 CIF construction/syntax error, inconsistent or missing data  
 14 ALERT type 2 Indicator that the structure model may be wrong or deficient  
 2 ALERT type 3 Indicator that the structure quality may be low  
 1 ALERT type 4 Improvement, methodology, query or suggestion  
 0 ALERT type 5 Informative message, check

---

## Datablock: compound5a

---

Bond precision: C-C = 0.0097 A

Wavelength=0.71075

Cell: a=9.3412(3) b=13.2993(7) c=21.3355(14)  
 alpha=93.977(4) beta=101.963(4) gamma=103.821(2)

Temperature: 103 K

|                | Calculated           | Reported             |
|----------------|----------------------|----------------------|
| Volume         | 2498.1(2)            | 2498.1(2)            |
| Space group    | P -1                 | P -1                 |
| Hall group     | -P 1                 | -P 1                 |
| Moiety formula | C58 H62 Cl2 Fe Ge Se | C58 H62 Cl2 Fe Ge Se |
| Sum formula    | C58 H62 Cl2 Fe Ge Se | C58 H62 Cl2 Fe Ge Se |
| Mr             | 1037.40              | 1037.37              |
| Dx,g cm-3      | 1.379                | 1.379                |
| Z              | 2                    | 2                    |
| Mu (mm-1)      | 1.765                | 1.765                |
| F000           | 1072.0               | 1072.0               |
| F000'          | 1073.66              |                      |
| h,k,lmax       | 11,16,26             | 11,16,26             |
| Nref           | 10348                | 10245                |
| Tmin,Tmax      | 0.844,0.884          | 0.816,0.886          |
| Tmin'          | 0.809                |                      |

Correction method= # Reported T Limits: Tmin=0.816 Tmax=0.886  
 AbsCorr = MULTI-SCAN

Data completeness= 0.990

Theta(max)= 26.500

R(reflections)= 0.0736( 6562)      wR2(reflections)= 0.1712( 10245)

S = 1.136      Npar= 596

---

The following ALERTS were generated. Each ALERT has the format

**test-name\_ALERT\_alert-type\_alert-level.**

Click on the hyperlinks for more details of the test.

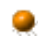

#### Alert level B

|                   |                         |     |       |   |          |
|-------------------|-------------------------|-----|-------|---|----------|
| PLAT230_ALERT_2_B | Hirshfeld Test Diff for | Gel | --Cl1 | . | 7.5 s.u. |
| PLAT230_ALERT_2_B | Hirshfeld Test Diff for | Gel | --Cl2 | . | 7.6 s.u. |

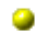

#### Alert level C

RINTA01\_ALERT\_3\_C The value of Rint is greater than 0.12

Rint given 0.126

|                   |                                                  |                         |         |        |
|-------------------|--------------------------------------------------|-------------------------|---------|--------|
| PLAT020_ALERT_3_C | The Value of Rint is Greater Than 0.12           | .....                   | 0.126   | Report |
| PLAT220_ALERT_2_C | Non-Solvent Resd 1 C                             | Ueq(max)/Ueq(min) Range | 3.4     | Ratio  |
| PLAT242_ALERT_2_C | Low 'MainMol' Ueq as Compared to Neighbors of    |                         | C37     | Check  |
| PLAT242_ALERT_2_C | Low 'MainMol' Ueq as Compared to Neighbors of    |                         | C41     | Check  |
| PLAT341_ALERT_3_C | Low Bond Precision on C-C Bonds                  | .....                   | 0.00972 | Ang.   |
| PLAT906_ALERT_3_C | Large K Value in the Analysis of Variance        | .....                   | 7.647   | Check  |
| PLAT906_ALERT_3_C | Large K Value in the Analysis of Variance        | .....                   | 2.155   | Check  |
| PLAT911_ALERT_3_C | Missing FCF Refl Between Thmin & STh/L=          | 0.600                   | 24      | Report |
| PLAT978_ALERT_2_C | Number C-C Bonds with Positive Residual Density. |                         | 0       | Info   |

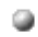

#### Alert level G

|                   |                                                  |           |      |       |
|-------------------|--------------------------------------------------|-----------|------|-------|
| PLAT066_ALERT_1_G | Predicted and Reported Tmin&Tmax Range Identical |           | ?    | Check |
| PLAT083_ALERT_2_G | SHELXL Second Parameter in WGHT Unusually Large  |           | 8.00 | Why ? |
| PLAT301_ALERT_3_G | Main Residue Disorder .....                      | (Resd 1 ) | 5%   | Note  |
| PLAT794_ALERT_5_G | Tentative Bond Valency for Fe1                   | (II)      | 2.09 | Info  |
| PLAT910_ALERT_3_G | Missing # of FCF Reflection(s) Below Theta(Min). |           | 1    | Note  |
| PLAT912_ALERT_4_G | Missing # of FCF Reflections Above STh/L=        | 0.600     | 78   | Note  |
| PLAT933_ALERT_2_G | Number of OMIT Records in Embedded .res File ... |           | 5    | Note  |
| PLAT960_ALERT_3_G | Number of Intensities with I < - 2*sig(I) ...    |           | 64   | Check |

---

0 **ALERT level A** = Most likely a serious problem - resolve or explain  
2 **ALERT level B** = A potentially serious problem, consider carefully  
10 **ALERT level C** = Check. Ensure it is not caused by an omission or oversight  
8 **ALERT level G** = General information/check it is not something unexpected

1 ALERT type 1 CIF construction/syntax error, inconsistent or missing data  
8 ALERT type 2 Indicator that the structure model may be wrong or deficient  
9 ALERT type 3 Indicator that the structure quality may be low  
1 ALERT type 4 Improvement, methodology, query or suggestion  
1 ALERT type 5 Informative message, check

---

## Datablock: compound5b

---

Bond precision: C-C = 0.0115 A

Wavelength=0.71075

Cell: a=12.6102(6) b=15.3206(4) c=15.9034(7)  
 alpha=66.692(2) beta=68.112(2) gamma=71.139(3)  
 Temperature: 103 K

|                | Calculated           | Reported             |
|----------------|----------------------|----------------------|
| Volume         | 2562.02(19)          | 2562.03(19)          |
| Space group    | P -1                 | P -1                 |
| Hall group     | -P 1                 | -P 1                 |
| Moiety formula | C58 H62 Cl2 Fe Ge Te | C58 H62 Cl2 Fe Ge Te |
| Sum formula    | C58 H62 Cl2 Fe Ge Te | C58 H62 Cl2 Fe Ge Te |
| Mr             | 1086.04              | 1086.01              |
| Dx,g cm-3      | 1.408                | 1.408                |
| Z              | 2                    | 2                    |
| Mu (mm-1)      | 1.568                | 1.568                |
| F000           | 1108.0               | 1108.0               |
| F000'          | 1108.79              |                      |
| h,k,lmax       | 15,19,19             | 15,19,19             |
| Nref           | 10617                | 10195                |
| Tmin,Tmax      | 0.910,0.939          | 0.872,0.940          |
| Tmin'          | 0.868                |                      |

Correction method= # Reported T Limits: Tmin=0.872 Tmax=0.940  
 AbsCorr = MULTI-SCAN

Data completeness= 0.960 Theta(max)= 26.500

R(reflections)= 0.0680( 7101) wR2(reflections)= 0.1487( 10195)

S = 1.173 Npar= 632

The following ALERTS were generated. Each ALERT has the format

**test-name\_ALERT\_alert-type\_alert-level.**

Click on the hyperlinks for more details of the test.

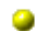

### Alert level C

|                                                                    |                             |              |
|--------------------------------------------------------------------|-----------------------------|--------------|
| PLAT213_ALERT_2_C Atom C60                                         | has ADP max/min Ratio ..... | 3.2 prolat   |
| PLAT213_ALERT_2_C Atom C61                                         | has ADP max/min Ratio ..... | 3.2 prolat   |
| PLAT213_ALERT_2_C Atom C65                                         | has ADP max/min Ratio ..... | 3.6 prolat   |
| PLAT213_ALERT_2_C Atom C49                                         | has ADP max/min Ratio ..... | 3.1 prolat   |
| PLAT213_ALERT_2_C Atom C50                                         | has ADP max/min Ratio ..... | 3.7 prolat   |
| PLAT213_ALERT_2_C Atom C56                                         | has ADP max/min Ratio ..... | 3.4 prolat   |
| PLAT234_ALERT_4_C Large Hirshfeld Difference C41                   | --C44                       | 0.17 Ang.    |
| PLAT242_ALERT_2_C Low 'MainMol' Ueq as Compared to Neighbors of    |                             | C51 Check    |
| PLAT342_ALERT_3_C Low Bond Precision on C-C Bonds .....            |                             | 0.01154 Ang. |
| PLAT906_ALERT_3_C Large K Value in the Analysis of Variance .....  |                             | 5.494 Check  |
| PLAT911_ALERT_3_C Missing FCF Refl Between Thmin & STh/L= 0.600    |                             | 136 Report   |
| PLAT934_ALERT_3_C Number of (Iobs-Icalc)/SigmaW > 10 Outliers .... |                             | 1 Check      |
| PLAT977_ALERT_2_C Check Negative Difference Density on H9          |                             | -0.39 eA-3   |
| PLAT978_ALERT_2_C Number C-C Bonds with Positive Residual Density. |                             | 0 Info       |

## ● Alert level G

|                   |                                                  |       |        |
|-------------------|--------------------------------------------------|-------|--------|
| PLAT003_ALERT_2_G | Number of Uiso or Uij Restrained non-H Atoms ... | 8     | Report |
| PLAT066_ALERT_1_G | Predicted and Reported Tmin&Tmax Range Identical | ?     | Check  |
| PLAT083_ALERT_2_G | SHELXL Second Parameter in WGHT Unusually Large  | 12.66 | Why ?  |
| PLAT178_ALERT_4_G | The CIF-Embedded .res File Contains SIMU Records | 2     | Report |
| PLAT186_ALERT_4_G | The CIF-Embedded .res File Contains ISOR Records | 1     | Report |
| PLAT301_ALERT_3_G | Main Residue Disorder .....(Resd 1 )             | 11%   | Note   |
| PLAT432_ALERT_2_G | Short Inter X...Y Contact C23 ..C23              | 2.97  | Ang.   |
| PLAT794_ALERT_5_G | Tentative Bond Valency for Fe1 (II) .            | 2.09  | Info   |
| PLAT860_ALERT_3_G | Number of Least-Squares Restraints .....         | 102   | Note   |
| PLAT912_ALERT_4_G | Missing # of FCF Reflections Above STh/L= 0.600  | 286   | Note   |
| PLAT960_ALERT_3_G | Number of Intensities with I < - 2*sig(I) ...    | 67    | Check  |

- 
- 0 **ALERT level A** = Most likely a serious problem - resolve or explain  
0 **ALERT level B** = A potentially serious problem, consider carefully  
14 **ALERT level C** = Check. Ensure it is not caused by an omission or oversight  
11 **ALERT level G** = General information/check it is not something unexpected
- 1 ALERT type 1 CIF construction/syntax error, inconsistent or missing data  
12 ALERT type 2 Indicator that the structure model may be wrong or deficient  
7 ALERT type 3 Indicator that the structure quality may be low  
4 ALERT type 4 Improvement, methodology, query or suggestion  
1 ALERT type 5 Informative message, check
- 

It is advisable to attempt to resolve as many as possible of the alerts in all categories. Often the minor alerts point to easily fixed oversights, errors and omissions in your CIF or refinement strategy, so attention to these fine details can be worthwhile. In order to resolve some of the more serious problems it may be necessary to carry out additional measurements or structure refinements. However, the purpose of your study may justify the reported deviations and the more serious of these should normally be commented upon in the discussion or experimental section of a paper or in the "special\_details" fields of the CIF. checkCIF was carefully designed to identify outliers and unusual parameters, but every test has its limitations and alerts that are not important in a particular case may appear. Conversely, the absence of alerts does not guarantee there are no aspects of the results needing attention. It is up to the individual to critically assess their own results and, if necessary, seek expert advice.

### Publication of your CIF in IUCr journals

A basic structural check has been run on your CIF. These basic checks will be run on all CIFs submitted for publication in IUCr journals (*Acta Crystallographica*, *Journal of Applied Crystallography*, *Journal of Synchrotron Radiation*); however, if you intend to submit to *Acta Crystallographica Section C* or *E* or *IUCrData*, you should make sure that full publication checks are run on the final version of your CIF prior to submission.

### Publication of your CIF in other journals

Please refer to the *Notes for Authors* of the relevant journal for any special instructions relating to CIF submission.

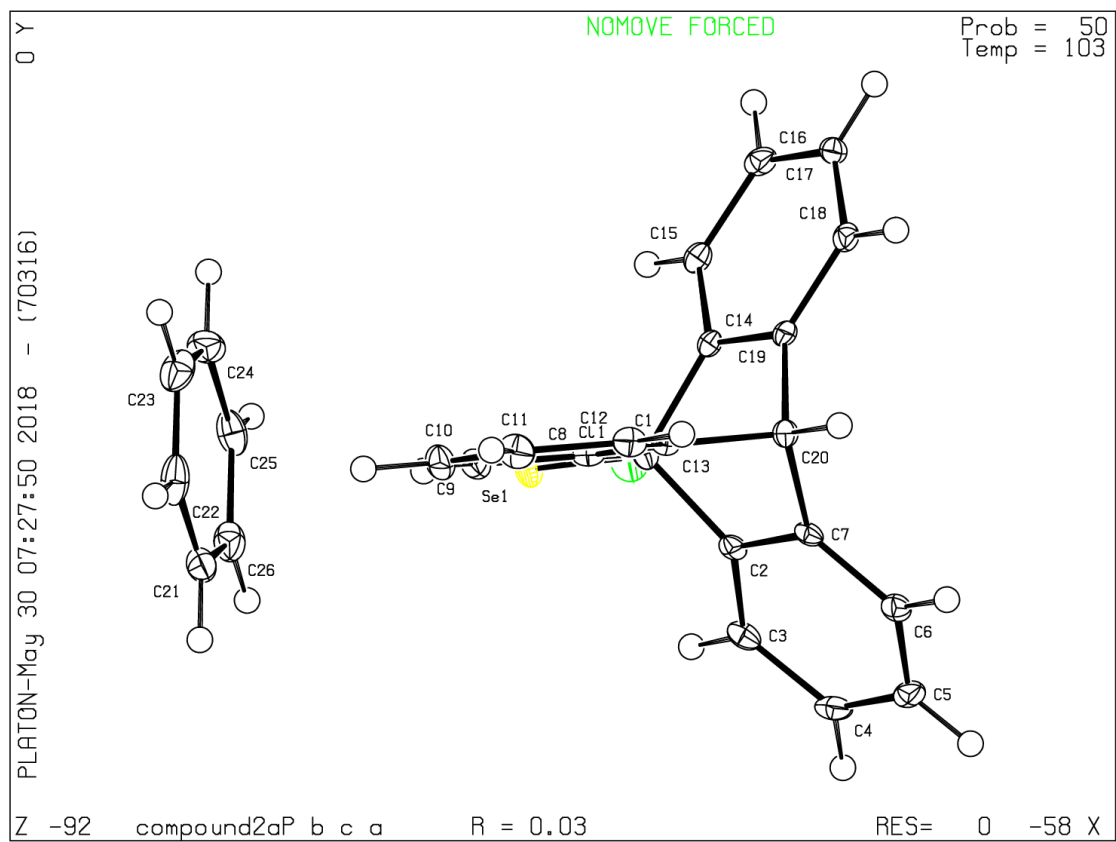



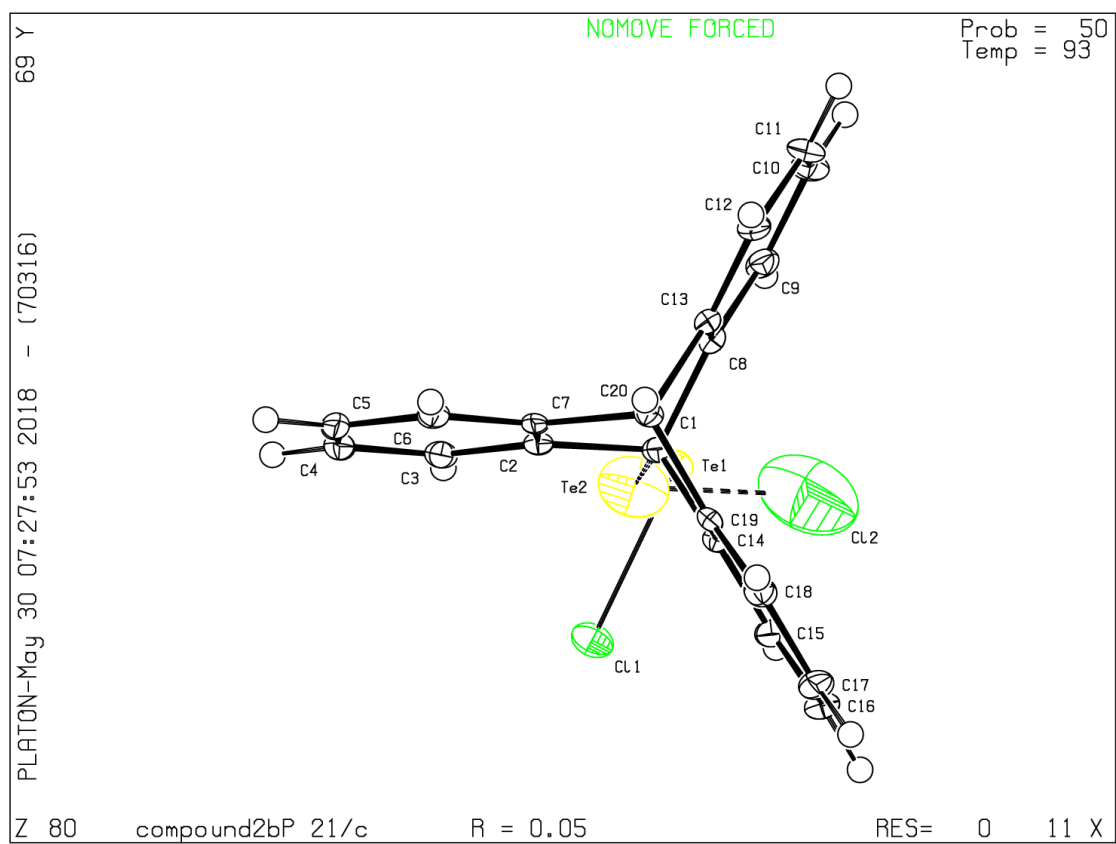

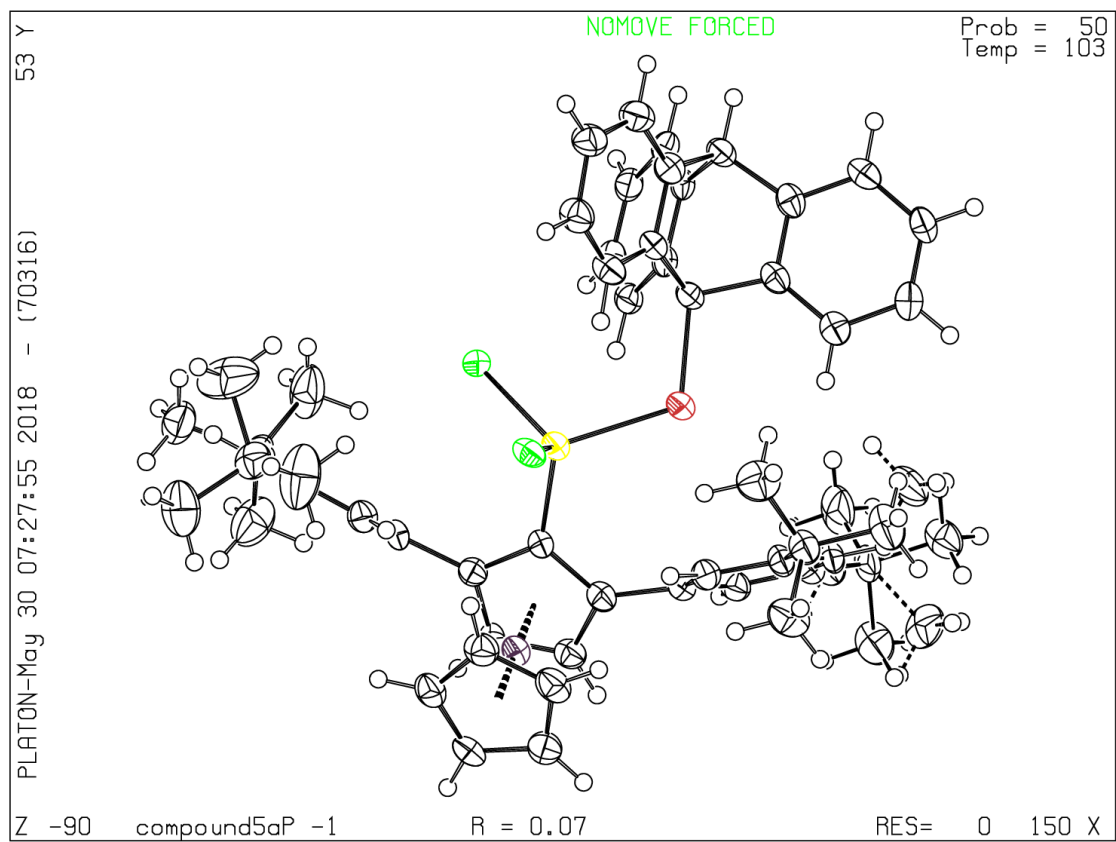

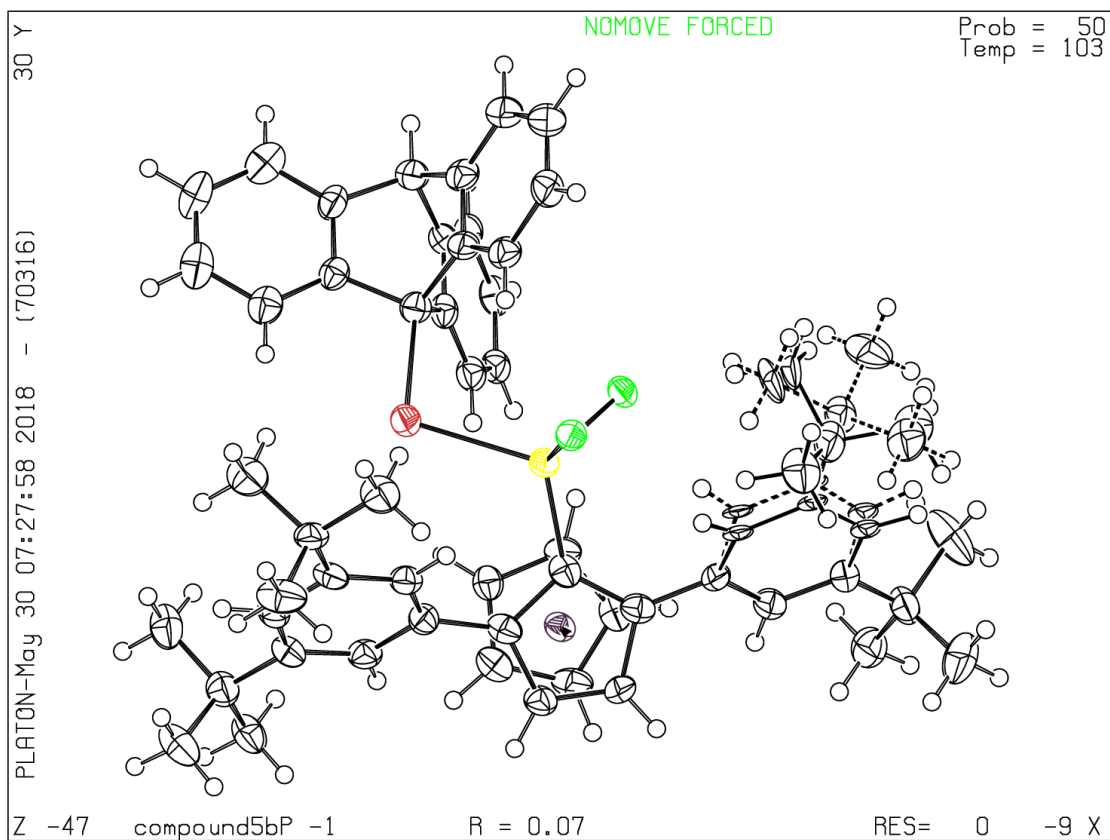

Supplement: s1 [file s1]
